# Supplementary material for: Genomic insights into the virulence and salt tolerance of Staphylococcus equorum
Source: PubMed Central journal article supplement (PMC5511256; doi:10.1038/s41598-017-05918-5), 2017-07-14

**Genomic insights into the virulence and salt tolerance of *Staphylococcus equorum***

**Supplementary Information**

Do-Won Jeong<sup>1</sup>, Sojeong Heo<sup>2</sup>, Sangryeol Ryu<sup>3</sup>, Jochen Blom<sup>4</sup>, Jong-Hoon Lee<sup>2,\*</sup>

<sup>1</sup>Department of Food and Nutrition, Dongduk Women's University, Seoul 02748, Republic of Korea

<sup>2</sup>Department of Food Science and Biotechnology, Kyonggi University, Suwon 16227, Republic of Korea

<sup>3</sup>Department of Food and Animal Biotechnology, Department of Agricultural Biotechnology, and Center for Food and Bioconvergence, Seoul National University, Seoul 08826, Republic of Korea

<sup>4</sup>Bioinformatics and System Biology, Justus-Liebig-University Giessen, 35392 Giessen, Germany

\*Corresponding author: Jong-Hoon Lee (email: [jhl@kgu.ac.kr](mailto:jhl@kgu.ac.kr))

Table S1. Primer lists for the cloning of potassium voltage-gated channel genes.

| <b>Target gene</b>              | <b>Primer name</b> | <b>Sequence (5'→3')</b> |
|---------------------------------|--------------------|-------------------------|
| AVJ22_RS01775                   | F-233              | CCATTGGCGCGCCACAAATT    |
|                                 | R-234              | GCTCGCAATAATCAATCA      |
| SE1039_RS01900                  | F-217              | CATTGGCGTAGCACAAAAGC    |
|                                 | R-250              | CAATTAGCTAGATTCGCGC     |
| SE1039_RS01905                  | F-251              | GCGCGAATCTAGCTAATTG     |
|                                 | R-218              | GCTCGGGATAACCAGACA      |
| SE1039_RS01900 & SE1039_RS01905 | F-217              | CATTGGCGTAGCACAAAAGC    |
|                                 | R-218              | GCTCGGGATAACCAGACA      |

Table S2. List of singletons generated by comparing the genomes of five *S. equorum* strains.

| Strain | Gene locus    | Product                                             |
|--------|---------------|-----------------------------------------------------|
| KM1031 | AWC34_RS00835 | hypothetical protein                                |
|        | AWC34_RS01535 | UDP-glucose 4-epimerase                             |
|        | AWC34_RS01540 | capsular polysaccharide biosynthesis protein Cap 8F |
|        | AWC34_RS01545 | UDP-N-acetylglucosamine 2-epimerase                 |
|        | AWC34_RS01550 | O-acetyl transferase                                |
|        | AWC34_RS01555 | capsular polysaccharide biosynthesis protein        |
|        | AWC34_RS01560 | hypothetical protein                                |
|        | AWC34_RS01565 | capsular biosynthesis protein                       |
|        | AWC34_RS01570 | UDP-N-acetyl-D-mannosamine dehydrogenase            |
|        | AWC34_RS01575 | glycosyltransferase family 1                        |
|        | AWC34_RS01585 | hypothetical protein                                |
|        | AWC34_RS01660 | hypothetical protein                                |
|        | AWC34_RS01805 | antibiotic biosynthesis monooxygenase               |
|        | AWC34_RS01965 | hypothetical protein                                |
|        | AWC34_RS04410 | hypothetical protein                                |
|        | AWC34_RS11775 | hypothetical protein                                |
|        | AWC34_RS12575 | type I site-specific deoxyribonuclease              |
|        | AWC34_RS12585 | hypothetical protein                                |
|        | AWC34_RS12600 | hypothetical protein                                |
|        | AWC34_RS12605 | DNA methyltransferase                               |
|        | AWC34_RS12610 | restriction endonuclease                            |
|        | AWC34_RS12655 | hypothetical protein                                |
|        | AWC34_RS12660 | hypothetical protein                                |
|        | AWC34_RS12665 | hypothetical protein                                |
|        | AWC34_RS13000 | hypothetical protein                                |
|        | AWC34_RS13030 | hypothetical protein                                |
|        | AWC34_RS13035 | hypothetical protein                                |
|        | AWC34_RS13040 | hypothetical protein                                |
|        | AWC34_RS12870 | hypothetical protein                                |
|        | AWC34_RS12875 | hypothetical protein                                |
|        | AWC34_RS12880 | hypothetical protein                                |
|        | AWC34_RS12925 | hypothetical protein                                |
|        | AWC34_RS12965 | MFS transporter                                     |
|        | AWC34_RS12970 | MFS transporter                                     |
|        | AWC34_RS12975 | hypothetical protein                                |
|        | AWC34_RS12985 | hypothetical protein                                |
|        | AWC34_RS12990 | DNA-binding protein                                 |
|        | AWC34_RS13050 | hypothetical protein                                |
|        | AWC34_RS13170 | 4-hydroxy-tetrahydrodipicolinate synthase           |
|        | AWC34_RS13175 | hypothetical protein                                |
|        | AWC34_RS13190 | hypothetical protein                                |
|        | AWC34_RS13195 | hypothetical protein                                |
|        | AWC34_RS13195 | hypothetical protein                                |
|        | AWC34_RS13195 | hypothetical protein                                |
|        | AWC34_RS13195 | hypothetical protein                                |

| Strain | Gene locus    | Product                                                            |
|--------|---------------|--------------------------------------------------------------------|
|        | AWC34_RS13200 | hypothetical protein                                               |
|        | AWC34_RS13200 | methyltryptophan oxidase                                           |
|        | AWC34_RS13230 | RNA-directed DNA polymerase                                        |
|        | AWC34_RS13110 | hypothetical protein                                               |
|        | AWC34_RS13245 | hypothetical protein                                               |
|        | AWC34_RS13160 | hypothetical protein                                               |
|        | AWC34_RS13170 | 4-hydroxy-tetrahydrodipicolinate synthase                          |
|        | AWC34_RS13175 | hypothetical protein                                               |
|        | AWC34_RS13190 | hypothetical protein                                               |
|        | AWC34_RS13195 | hypothetical protein                                               |
|        | AWC34_RS13200 | methyltryptophan oxidase                                           |
|        | AWC34_RS13215 | hypothetical protein                                               |
|        | AWC34_RS13230 | hypothetical protein                                               |
|        | AWC34_RS13240 | hypothetical protein                                               |
|        | AWC34_RS13160 | hypothetical protein                                               |
| C2014  | AVJ22_RS00045 | membrane protein                                                   |
|        | AVJ22_RS00050 | hypothetical protein                                               |
|        | AVJ22_RS00095 | alpha-N-arabinofuranosidase                                        |
|        | AVJ22_RS00100 | hypothetical protein                                               |
|        | AVJ22_RS00140 | hypothetical protein                                               |
|        | AVJ22_RS00150 | glycosyl transferase                                               |
|        | AVJ22_RS00160 | hypothetical protein                                               |
|        | AVJ22_RS00465 | linear gramicidin dehydrogenase LgrE                               |
|        | AVJ22_RS13245 | IS1272, transposase                                                |
|        | AVJ22_RS00545 | hypothetical protein                                               |
|        | AVJ22_RS00575 | hypothetical protein                                               |
|        | AVJ22_RS00580 | hypothetical protein                                               |
|        | AVJ22_RS00585 | myo-inosose-2 dehydratase                                          |
|        | AVJ22_RS00590 | hypothetical protein                                               |
|        | AVJ22_RS00595 | hypothetical protein                                               |
|        | AVJ22_RS00600 | methylmalonate-semialdehyde dehydrogenase                          |
|        | AVJ22_RS00605 | hypothetical protein                                               |
|        | AVJ22_RS00610 | 5-dehydro-2-deoxygluconokinase                                     |
|        | AVJ22_RS00615 | hypothetical protein                                               |
|        | AVJ22_RS00660 | hypothetical protein                                               |
|        | AVJ22_RS01520 | hypothetical protein                                               |
|        | AVJ22_RS01525 | galactosamine-containing minor teichoic acid bio synthesis protein |
|        | AVJ22_RS01535 | hypothetical protein                                               |
|        | AVJ22_RS01705 | hypothetical protein                                               |
|        | AVJ22_RS01710 | hypothetical protein                                               |
|        | AVJ22_RS01735 | hypothetical protein                                               |
|        | AVJ22_RS01745 | hypothetical protein                                               |
|        | AVJ22_RS01750 | hypothetical protein                                               |
|        | AVJ22_RS01755 | (2-aminoethyl)phosphonate-pyruvate transaminase                    |
|        | AVJ22_RS01760 | hypothetical protein                                               |
|        | AVJ22_RS01780 | hypothetical protein                                               |

| Strain | Gene locus    | Product                                            |
|--------|---------------|----------------------------------------------------|
|        | AVJ22_RS01795 | hypothetical protein                               |
|        | AVJ22_RS01875 | hypothetical protein                               |
|        | AVJ22_RS02955 | hypothetical protein                               |
|        | AVJ22_RS03910 | IS1272, transposase                                |
|        | AVJ22_RS04345 | integrase                                          |
|        | AVJ22_RS04350 | hypothetical protein                               |
|        | AVJ22_RS04355 | hypothetical protein                               |
|        | AVJ22_RS04360 | hypothetical protein                               |
|        | AVJ22_RS04370 | hypothetical protein                               |
|        | AVJ22_RS04375 | hypothetical protein                               |
|        | AVJ22_RS04380 | hypothetical protein                               |
|        | AVJ22_RS04385 | hypothetical protein                               |
|        | AVJ22_RS04395 | hypothetical protein                               |
|        | AVJ22_RS04395 | cell division protein ZipA                         |
|        | AVJ22_RS04785 | transposase                                        |
|        | AVJ22_RS05345 | hypothetical protein                               |
|        | AVJ22_RS05340 | hypothetical protein                               |
|        | AVJ22_RS05355 | hypothetical protein                               |
|        | AVJ22_RS05375 | hypothetical protein                               |
|        | AVJ22_RS05395 | hypothetical protein                               |
|        | AVJ22_RS05400 | hypothetical protein                               |
|        | AVJ22_RS05420 | hypothetical protein                               |
|        | AVJ22_RS05425 | hypothetical protein                               |
|        | AVJ22_RS05435 | hypothetical protein                               |
|        | AVJ22_RS05445 | hypothetical protein                               |
|        | AVJ22_RS05450 | dUTP pyrophosphatase                               |
|        | AVJ22_RS05455 | hypothetical protein                               |
|        | AVJ22_RS05465 | hypothetical protein                               |
|        | AVJ22_RS05475 | hypothetical protein                               |
|        | AVJ22_RS05480 | hypothetical protein                               |
|        | AVJ22_RS05480 | hypothetical protein                               |
|        | AVJ22_RS05490 | hypothetical protein                               |
|        | AVJ22_RS05545 | hypothetical protein                               |
|        | AVJ22_RS05620 | hypothetical protein                               |
|        | AVJ22_RS05625 | hypothetical protein                               |
|        | AVJ22_RS05660 | putative protein                                   |
|        | AVJ22_RS05820 | hypothetical protein                               |
|        | AVJ22_RS05825 | lantibiotic dehydratase, N-terminal domain protein |
|        | AVJ22_RS05830 | lantibiotic dehydratase, C-terminal domain protein |
|        | AVJ22_RS05835 | hypothetical protein                               |
|        | AVJ22_RS06375 | hypothetical protein                               |
|        | AVJ22_RS06845 | hypothetical protein                               |
|        | AVJ22_RS06850 | hypothetical protein                               |
|        | AVJ22_RS06855 | hypothetical protein                               |
|        | AVJ22_RS06860 | hypothetical protei                                |
|        | AVJ22_RS07210 | hypothetical protein                               |

| Strain | Gene locus    | Product                                                    |
|--------|---------------|------------------------------------------------------------|
|        | AVJ22_RS08070 | transposase                                                |
|        | AVJ22_RS08075 | hypothetical protein                                       |
|        | AVJ22_RS08635 | hypothetical protein                                       |
|        | AVJ22_RS08660 | hypothetical protein                                       |
|        | AVJ22_RS08665 | hypothetical protein                                       |
|        | AVJ22_RS13245 | IS1272, transposase                                        |
|        | AVJ22_RS09905 | transposase                                                |
|        | AVJ22_RS10620 | hypothetical protein                                       |
|        | AVJ22_RS13245 | transposase                                                |
|        | AVJ22_RS12225 | transposase                                                |
|        | AVJ22_RS12500 | hypothetical protein                                       |
|        | AVJ22_RS12775 | oxidoreductase, NAD-binding domain protein                 |
|        | AVJ22_RS12780 | hydrolase                                                  |
|        | AVJ22_RS12785 | hypothetical protein                                       |
|        | AVJ22_RS12790 | hypothetical protein                                       |
|        | AVJ22_RS12915 | hypothetical protein                                       |
|        | AVJ22_RS12920 | hypothetical protein                                       |
|        | AVJ22_RS13005 | leucine dehydrogenase                                      |
|        | AVJ22_RS13015 | hypothetical protein                                       |
|        | AVJ22_RS13280 | putative plasmid partition protein                         |
|        | AVJ22_RS13285 | CopG family transcriptional regulator                      |
|        | AVJ22_RS13290 | hypothetical protein                                       |
|        | AVJ22_RS13295 | hypothetical protein                                       |
|        | AVJ22_RS13300 | hypothetical protein                                       |
|        | AVJ22_RS13305 | hypothetical protein                                       |
|        | AVJ22_RS13310 | hypothetical protein                                       |
|        | AVJ22_RS13315 | hypothetical protein                                       |
|        | AVJ22_RS13015 | hypothetical protein                                       |
|        | AVJ22_RS13420 | transposase                                                |
|        | AVJ22_RS13425 | transposase                                                |
|        | AVJ22_RS13430 | GntR family transcriptional regulator                      |
|        | AVJ22_RS13435 | hypothetical protein                                       |
|        | AVJ22_RS13440 | hypothetical protein                                       |
|        | AVJ22_RS13445 | tagatose-bisphosphate aldolase                             |
|        | AVJ22_RS13450 | beta-galactosidase                                         |
|        | AVJ22_RS13455 | PTS mannose transporter subunit IIAB                       |
|        | AVJ22_RS13460 | hypothetical protein                                       |
|        | AVJ22_RS13465 | hypothetical protein                                       |
|        | AVJ22_RS13470 | hypothetical protein                                       |
|        | AVJ22_RS13480 | transporter                                                |
|        | AVJ22_RS13495 | hypothetical protein                                       |
|        | AVJ22_RS13530 | hypothetical protein                                       |
|        | AVJ22_RS13535 | 6-carboxyhexanoate-CoA ligase                              |
|        | AVJ22_RS13540 | hypothetical protein                                       |
|        | AVJ22_RS13550 | adenosylmethionine-8-amino-7-oxononanoate aminotransferase |

| Strain | Gene locus    | Product                                                    |
|--------|---------------|------------------------------------------------------------|
|        | AVJ22_RS13565 | adenosylmethionine-8-amino-7-oxononanoate aminotransferase |
|        | AVJ22_RS13565 | dethiobiotin synthase                                      |
|        | AVJ22_RS13565 | membrane protein                                           |
|        | AVJ22_RS13570 | hypothetical protein                                       |
|        | AVJ22_RS13580 | hypothetical protein                                       |
|        | AVJ22_RS13590 | hypothetical protein                                       |
|        | AVJ22_RS13600 | hypothetical protein                                       |
|        | AVJ22_RS13625 | sn-glycerol-3-phosphate transporter                        |
|        | AVJ22_RS13640 | putative protein                                           |
|        | AVJ22_RS13770 | hypothetical protein                                       |
|        | AVJ22_RS13775 | ribonuclease H                                             |
|        | AVJ22_RS13785 | hypothetical protein                                       |
|        | AVJ22_RS13790 | hypothetical protein                                       |
|        | AVJ22_RS13795 | hypothetical protein                                       |
|        | AVJ22_RS13800 | hypothetical protein                                       |
|        | AVJ22_RS13805 | hypothetical protein                                       |
|        | AVJ22_RS13825 | hypothetical protein                                       |
|        | AVJ22_RS14005 | hypothetical protein                                       |
|        | AVJ22_RS13640 | putative protein                                           |
|        | AVJ22_RS14015 | hypothetical protein                                       |
|        | AVJ22_RS14050 | hypothetical protein                                       |
|        | AVJ22_RS14055 | hypothetical protein                                       |
|        | AVJ22_RS14060 | hypothetical protein                                       |
|        | AVJ22_RS14065 | hypothetical protein                                       |
|        | AVJ22_RS14095 | haemolysin family calcium-binding region                   |
| KS1039 | SE1039_00170  | hypothetical protein                                       |
|        | SE1039_00200  | hypothetical protein                                       |
|        | SE1039_00300  | phenolic acid decarboxylase PadC                           |
|        | SE1039_00310  | hypothetical protein                                       |
|        | SE1039_00380  | hypothetical protein                                       |
|        | SE1039_00400  | acyl esterase                                              |
|        | SE1039_00430  | hypothetical protein                                       |
|        | SE1039_00440  | Macrolide 2-phosphotransferase II                          |
|        | SE1039_00480  | GntR family transcriptional regulator                      |
|        | SE1039_00490  | 3-isopropylmalate dehydrogenase                            |
|        | SE1039_00500  | cation transporter                                         |
|        | SE1039_00540  | hypothetical protein                                       |
|        | SE1039_00570  | hypothetical protein                                       |
|        | SE1039_00580  | hypothetical protein                                       |
|        | SE1039_00590  | ArsR family transcriptional regulator                      |
|        | SE1039_00670  | hypothetical protein                                       |
|        | SE1039_01890  | hypothetical protein                                       |
|        | SE1039_01910  | hypothetical protein                                       |
|        | SE1039_01920  | hypothetical protein                                       |
|        | SE1039_01930  | hypothetical protein                                       |

| Strain | Gene locus   | Product                                        |
|--------|--------------|------------------------------------------------|
|        | SE1039_01940 | hypothetical protein                           |
|        | SE1039_03050 | hypothetical protein                           |
|        | SE1039_03060 | hypothetical protein                           |
|        | SE1039_03200 | hypothetical protein                           |
|        | SE1039_03210 | hypothetical protein                           |
|        | SE1039_03220 | hypothetical protein                           |
|        | SE1039_03540 | TetR family transcriptional regulator          |
|        | SE1039_03560 | hypothetical protein                           |
|        | SE1039_03570 | phosphotransferase                             |
|        | SE1039_03580 | hypothetical protein                           |
|        | SE1039_03590 | hypothetical protein                           |
|        | SE1039_03630 | hypothetical protein                           |
|        | SE1039_03640 | hypothetical protein                           |
|        | SE1039_03760 | diguanylate cyclase                            |
|        | SE1039_03780 | NADP oxidoreductase                            |
|        | SE1039_04010 | hypothetical protein                           |
|        | SE1039_09040 | putative protein                               |
|        | SE1039_09050 | hypothetical protein                           |
|        | SE1039_09070 | hypothetical protein                           |
|        | SE1039_09080 | hypothetical protein                           |
|        | SE1039_09090 | hypothetical protein                           |
|        | SE1039_09100 | hypothetical protein                           |
|        | SE1039_09120 | hypothetical protein                           |
|        | SE1039_09610 | integrase                                      |
|        | SE1039_09620 | hypothetical protein                           |
|        | SE1039_09630 | hypothetical protein                           |
|        | SE1039_09660 | hypothetical protein                           |
|        | SE1039_09670 | hypothetical protein                           |
|        | SE1039_09680 | hypothetical protein                           |
|        | SE1039_09690 | hypothetical protein                           |
|        | SE1039_09700 | hypothetical protein                           |
|        | SE1039_09710 | hypothetical protein                           |
|        | SE1039_09720 | hypothetical protein                           |
|        | SE1039_09730 | chromosome replication initiation protein DnaA |
|        | SE1039_09740 | hypothetical protein                           |
|        | SE1039_09750 | single-stranded DNA-binding protein            |
|        | SE1039_09760 | hypothetical protein                           |
|        | SE1039_09770 | hypothetical protein                           |
|        | SE1039_09780 | hypothetical protein                           |
|        | SE1039_09810 | hypothetical protein                           |
|        | SE1039_09820 | RusA                                           |
|        | SE1039_09840 | hypothetical protein                           |
|        | SE1039_09910 | putative protein                               |
|        | SE1039_09950 | terminase                                      |
|        | SE1039_09990 | putative protein                               |
|        | SE1039_10110 | hypothetical protein                           |



| Strain | Gene locus   | Product                                               |
|--------|--------------|-------------------------------------------------------|
|        | SE1039_10120 | hypothetical protein                                  |
|        | SE1039_10140 | putative protein                                      |
|        | SE1039_10210 | chromosome partitioning protein ParA                  |
|        | SE1039_10220 | hypothetical protein                                  |
|        | SE1039_10230 | hypothetical protein                                  |
|        | SE1039_10250 | hypothetical protein                                  |
|        | SE1039_10540 | hypothetical protein                                  |
|        | SE1039_11680 | hypothetical protein                                  |
|        | SE1039_11690 | hypothetical protein                                  |
|        | SE1039_11700 | hypothetical protein                                  |
|        | SE1039_12000 | hypothetical protein                                  |
|        | SE1039_12010 | phenolic acid decarboxylase subunit B                 |
|        | SE1039_12020 | hypothetical protein                                  |
|        | SE1039_12030 | hypothetical protein                                  |
|        | SE1039_12040 | hypothetical protein                                  |
|        | SE1039_15930 | hypothetical protein                                  |
|        | SE1039_17640 | hypothetical protein                                  |
|        | SE1039_21600 | hypothetical protein                                  |
|        | SE1039_23220 | carbohydrate kinase                                   |
|        | SE1039_25290 | membrane protein                                      |
|        | SE1039_25650 | protein-Npi-phosphohistidine-sugar phosphotransferase |
|        | SE1039_25660 | hypothetical protein                                  |
|        | SE1039_25690 | exporter protein                                      |
|        | SE1039_25700 | hypothetical protein                                  |
|        | SE1039_25710 | hypothetical protein                                  |
|        | SE1039_25720 | RNA-directed DNA polymerase                           |
|        | SE1039_25730 | putative membrane protein                             |
|        | SE1039_25740 | hypothetical protein                                  |
|        | SE1039_25910 | hypothetical protein                                  |
|        | SE1039_25960 | hypothetical protein                                  |
|        | SE1039_25970 | CRISPR-associated protein Cas6                        |
|        | SE1039_25980 | CRISPR-associated protein Csm6                        |
|        | SE1039_25990 | CRISPR-associated protein Csm5                        |
|        | SE1039_26000 | CRISPR-associated protein Csm4                        |
|        | SE1039_26010 | CRISPR-associated protein Cmr4                        |
|        | SE1039_26020 | CRISPR-associated protein Csm2                        |
|        | SE1039_26030 | CRISPR-associated protein Csm1                        |
|        | SE1039_26040 | CRISPR-associated Csm1 family protein                 |
|        | SE1039_26050 | CRISPR-associated protein Cas2                        |
|        | SE1039_26060 | CRISPR-associated protein Cas1                        |
|        | SE1039_26070 | restriction endonuclease subunit R                    |
|        | SE1039_26080 | hypothetical protein                                  |
|        | SE1039_26190 | hypothetical protein                                  |
|        | SE1039_26240 | hypothetical protein                                  |
|        | SE1039_26250 | hypothetical protein                                  |
|        | SE1039_26270 | hypothetical protein                                  |

| Strain | Gene locus     | Product                                |
|--------|----------------|----------------------------------------|
|        | SE1039_26320   | CDP-glycerol glycerophosphotransferase |
|        | SE1039_26410   | hypothetical protein                   |
|        | SE1039_26420   | hypothetical protein                   |
|        | SE1039_26490   | hypothetical protein                   |
|        | SE1039_26500   | hypothetical protein                   |
| Mu2    | SEQMU2_RS14270 | hypothetical protein                   |
|        | SEQMU2_RS14275 | hypothetical protein                   |
|        | SEQMU2_RS14280 | hypothetical protein                   |
|        | SEQMU2_RS14285 | MerR family transcriptional regulator  |
|        | SEQMU2_RS14290 | integrase                              |
|        | SEQMU2_RS14295 | hypothetical protein                   |
|        | SEQMU2_RS14300 | hypothetical protein                   |
|        | SEQMU2_RS14305 | hypothetical protein                   |
|        | SEQMU2_RS14240 | hypothetical protein                   |
|        | SEQMU2_RS14260 | hypothetical protein                   |
|        | SEQMU2_RS14265 | hypothetical protein                   |
|        | SEQMU2_RS14075 | Zn-dependent alcohol dehydrogenase     |
|        | SEQMU2_RS14105 | hypothetical protein                   |
|        | SEQMU2_RS14120 | hypothetical protein                   |
|        | SEQMU2_RS14180 | hypothetical protein                   |
|        | SEQMU2_RS13815 | hypothetical protein                   |
|        | SEQMU2_RS13820 | hypothetical protein                   |
|        | SEQMU2_RS13835 | hypothetical protein                   |
|        | SEQMU2_RS13840 | addiction module protein               |
|        | SEQMU2_RS13845 | prevent-host-death protein             |
|        | SEQMU2_RS13850 | hypothetical protein                   |
|        | SEQMU2_RS13855 | hypothetical protein                   |
|        | SEQMU2_RS13860 | hypothetical protein                   |
|        | SEQMU2_RS13885 | hypothetical protein                   |
|        | SEQMU2_RS13915 | hypothetical protein                   |
|        | SEQMU2_RS13925 | transporter                            |
|        | SEQMU2_RS13935 | hypothetical protein                   |
|        | SEQMU2_RS10665 | hypothetical protein                   |
|        | SEQMU2_RS10675 | DNA-binding protein                    |
|        | SEQMU2_RS10680 | Rha family transcriptional regulator   |
|        | SEQMU2_RS10685 | CRISPR-associated protein Cas2         |
|        | SEQMU2_RS10690 | hypothetical protein                   |
|        | SEQMU2_RS10695 | hypothetical protein                   |
|        | SEQMU2_RS10700 | hypothetical protein                   |
|        | SEQMU2_RS10705 | hypothetical protein                   |
|        | SEQMU2_RS10750 | hypothetical protein                   |
|        | SEQMU2_RS11280 | hypothetical protein                   |
|        | SEQMU2_RS11325 | hypothetical protein                   |
|        | SEQMU2_RS11330 | hypothetical protein                   |
|        | SEQMU2_RS11340 | hypothetical protein                   |
|        | SEQMU2_RS11345 | hypothetical protein                   |

| Strain | Gene locus     | Product                             |
|--------|----------------|-------------------------------------|
|        | SEQMU2_RS11350 | hypothetical protein                |
|        | SEQMU2_RS11355 | phage protein                       |
|        | SEQMU2_RS11360 | DNA primase                         |
|        | SEQMU2_RS11365 | hypothetical protein                |
|        | SEQMU2_RS11370 | hypothetical protein                |
|        | SEQMU2_RS11375 | hypothetical protein                |
|        | SEQMU2_RS11380 | hypothetical protein                |
|        | SEQMU2_RS11385 | phage integrase                     |
|        | SEQMU2_RS12835 | integrase                           |
|        | SEQMU2_RS08255 | pathogenicity island protein        |
|        | SEQMU2_RS08265 | hypothetical protein                |
|        | SEQMU2_RS08270 | hypothetical protein                |
|        | SEQMU2_RS08275 | hypothetical protein                |
|        | SEQMU2_RS08280 | hypothetical protein                |
|        | SEQMU2_RS08285 | hypothetical protein                |
|        | SEQMU2_RS08295 | hypothetical protein                |
|        | SEQMU2_RS08300 | hypothetical protein                |
|        | SEQMU2_RS08585 | 5-aminolevulinate synthase          |
|        | SEQMU2_RS08225 | DNA-binding protein                 |
|        | SEQMU2_RS08230 | antirepressor                       |
|        | SEQMU2_RS08235 | hypothetical protein                |
|        | SEQMU2_RS08240 | hypothetical protein                |
|        | SEQMU2_RS08245 | primase                             |
|        | SEQMU2_RS08250 | hypothetical protein                |
|        | SEQMU2_RS06750 | hydrolase                           |
|        | SEQMU2_RS07815 | hypothetical protein                |
|        | SEQMU2_RS07820 | hypothetical protein                |
|        | SEQMU2_RS07825 | hypothetical protein                |
|        | SEQMU2_RS07830 | repressor                           |
|        | SEQMU2_RS07835 | hypothetical protein                |
|        | SEQMU2_RS07845 | phage protein                       |
|        | SEQMU2_RS07850 | hypothetical protein                |
|        | SEQMU2_RS07855 | hypothetical protein                |
|        | SEQMU2_RS07860 | hypothetical protein                |
|        | SEQMU2_RS07865 | hypothetical protein                |
|        | SEQMU2_RS07870 | hypothetical protein                |
|        | SEQMU2_RS07875 | hypothetical protein                |
|        | SEQMU2_RS07880 | hypothetical protein                |
|        | SEQMU2_RS07885 | hypothetical protein                |
|        | SEQMU2_RS07890 | single-stranded DNA-binding protein |
|        | SEQMU2_RS07895 | phage protein                       |
|        | SEQMU2_RS07900 | hypothetical protein                |
|        | SEQMU2_RS07910 | hypothetical protein                |
|        | SEQMU2_RS07915 | hypothetical protein                |
|        | SEQMU2_RS07920 | hypothetical protein                |
|        | SEQMU2_RS07930 | hypothetical protein                |

| Strain | Gene locus     | Product                               |
|--------|----------------|---------------------------------------|
|        | SEQMU2_RS07935 | hypothetical protein                  |
|        | SEQMU2_RS07940 | phage protein                         |
|        | SEQMU2_RS07950 | hypothetical protein                  |
|        | SEQMU2_RS07955 | hypothetical protein                  |
|        | SEQMU2_RS07995 | terminase                             |
|        | SEQMU2_RS08025 | phage protein                         |
|        | SEQMU2_RS08040 | hypothetical protein                  |
|        | SEQMU2_RS08050 | hypothetical protein                  |
|        | SEQMU2_RS08085 | hypothetical protein                  |
|        | SEQMU2_RS08090 | hypothetical protein                  |
|        | SEQMU2_RS06470 | pathogenicity island protein          |
|        | SEQMU2_RS06485 | hypothetical protein                  |
|        | SEQMU2_RS06495 | mRNA interferase PemK                 |
|        | SEQMU2_RS06515 | hypothetical protein                  |
|        | SEQMU2_RS05430 | hypothetical protein                  |
|        | SEQMU2_RS05435 | hypothetical protein                  |
|        | SEQMU2_RS05440 | hypothetical protein                  |
|        | SEQMU2_RS05445 | hypothetical protein                  |
|        | SEQMU2_RS05450 | hypothetical protein                  |
|        | SEQMU2_RS05455 | hypothetical protein                  |
|        | SEQMU2_RS05770 | membrane protein                      |
|        | SEQMU2_RS06210 | hypothetical protein                  |
|        | SEQMU2_RS06215 | hypothetical protein                  |
|        | SEQMU2_RS06220 | hypothetical protein                  |
|        | SEQMU2_RS06425 | integrase                             |
|        | SEQMU2_RS06430 | DNA-binding protein                   |
|        | SEQMU2_RS06435 | hypothetical protein                  |
|        | SEQMU2_RS06440 | hypothetical protein                  |
|        | SEQMU2_RS06445 | hypothetical protein                  |
|        | SEQMU2_RS06450 | hypothetical protein                  |
|        | SEQMU2_RS06460 | hypothetical protein                  |
|        | SEQMU2_RS06465 | hypothetical protein                  |
|        | SEQMU2_RS05165 | hypothetical protein                  |
|        | SEQMU2_RS05170 | hypothetical protein                  |
|        | SEQMU2_RS05205 | activator of HSP90 ATPase             |
|        | SEQMU2_RS05215 | glutamine amidotransferase            |
|        | SEQMU2_RS05220 | DeoR family transcriptional regulator |
|        | SEQMU2_RS05225 | hypothetical protein                  |
|        | SEQMU2_RS05230 | hypothetical protein                  |
|        | SEQMU2_RS05235 | hypothetical protein                  |
|        | SEQMU2_RS05250 | acetolactate synthase                 |
|        | SEQMU2_RS05270 | hypothetical protein                  |
|        | SEQMU2_RS05275 | hypothetical protein                  |
|        | SEQMU2_RS05315 | hypothetical protein                  |
|        | SEQMU2_RS05320 | hypothetical protein                  |
|        | SEQMU2_RS05325 | hypothetical protein                  |

| Strain      | Gene locus     | Product                                           |
|-------------|----------------|---------------------------------------------------|
|             | SEQMU2_RS05335 | hypothetical protein                              |
|             | SEQMU2_RS05355 | capsular polysaccharide biosynthesis protein CapM |
|             | SEQMU2_RS05370 | capsule biosynthesis protein CapJ                 |
|             | SEQMU2_RS05380 | hypothetical protein                              |
|             | SEQMU2_RS05385 | capsular polysaccharide biosynthesis protein      |
|             | SEQMU2_RS05025 | pathogenicity island protein                      |
|             | SEQMU2_RS05035 | abortive infection protein                        |
|             | SEQMU2_RS05040 | hypothetical protein                              |
|             | SEQMU2_RS05045 | hypothetical protein                              |
|             | SEQMU2_RS05050 | hypothetical protein                              |
|             | SEQMU2_RS05060 | hypothetical protein                              |
|             | SEQMU2_RS05065 | hypothetical protein                              |
|             | SEQMU2_RS05075 | phage head-tail adapter protein                   |
|             | SEQMU2_RS05080 | pathogenicity island protein                      |
|             | SEQMU2_RS04905 | hypothetical protein                              |
|             | SEQMU2_RS04915 | transcriptional regulator                         |
|             | SEQMU2_RS04955 | hypothetical protein                              |
|             | SEQMU2_RS04595 | Erm Leader peptide                                |
|             | SEQMU2_RS04870 | hypothetical protein                              |
|             | SEQMU2_RS04875 | hypothetical protein                              |
|             | SEQMU2_RS02440 | GntR family transcriptional regulator             |
|             | SEQMU2_RS02445 | PTS beta-glucoside transporter subunit IIABC      |
|             | SEQMU2_RS00570 | Linalool 8-monooxygenase                          |
|             | SEQMU2_RS00575 | hypothetical protein                              |
|             | SEQMU2_RS00580 | hydrolase                                         |
|             | SEQMU2_RS00280 | recombinase                                       |
|             | SEQMU2_RS00285 | phage protein                                     |
|             | SEQMU2_RS00290 | DNA-binding protein                               |
|             | SEQMU2_RS00295 | excisionase                                       |
|             | SEQMU2_RS00300 | hypothetical protein                              |
|             | SEQMU2_RS00305 | hypothetical protein                              |
|             | SEQMU2_RS00310 | DNA primase                                       |
|             | SEQMU2_RS00315 | hypothetical protein                              |
| UMC-CNS-924 | SEQU_RS16265   | hypothetical protein                              |
|             | SEQU_RS17065   | hypothetical protein                              |
|             | SEQU_RS17850   | hypothetical protein                              |
|             | SEQU_RS18240   | hypothetical protein                              |
|             | SEQU_RS18245   | hypothetical protein                              |
|             | SEQU_RS20935   | hypothetical protein                              |
|             | SEQU_RS20945   | hypothetical protein                              |
|             | SEQU_RS20950   | hypothetical protein                              |
|             | SEQU_RS20955   | hypothetical protein                              |
|             | SEQU_RS20960   | hypothetical protein                              |
|             | SEQU_RS20965   | hypothetical protein                              |
|             | SEQU_RS20970   | hypothetical protein                              |

| Strain | Gene locus     | Product                                        |
|--------|----------------|------------------------------------------------|
|        | SEQU_RS21005   | hypothetical protein                           |
|        | SEQU_RS21050   | hypothetical protein                           |
|        | SEQU_RS21440   | membrane protein                               |
|        | SEQU_RS23595   | pyridoxal phosphate-dependent aminotransferase |
|        | SEQU_RS23600   | hypothetical protein                           |
|        | SEQU_RS23610   | capsular biosynthesis protein                  |
|        | SEQU_RS23630   | hypothetical protein                           |
|        | SEQU_RS23635   | hypothetical protein                           |
|        | SEQU_RS23640   | hypothetical protein                           |
|        | SEQU_RS23645   | hypothetical protein                           |
|        | SEQU_RS25040   | hypothetical protein                           |
|        | SEQU_RS25215   | hypothetical protein                           |
|        | SEQU_RS25225   | hypothetical protein                           |
|        | SEQU_RS25230   | hypothetical protein                           |
|        | SEQU_RS25240   | hypothetical protein                           |
|        | SEQU_RS26430   | hypothetical protein                           |
|        | SEQU_RS26440   | hypothetical protein                           |
|        | SEQU_RS0113725 | antibiotic biosynthesis monooxygenase          |
|        | SEQU_RS26470   | hypothetical protein                           |
|        | SEQU_RS26480   | glycerol dehydrogenase                         |
|        | SEQU_RS26495   | hypothetical protein                           |
|        | SEQU_RS26500   | peptidase C39                                  |
|        | SEQU_RS26540   | hypothetical protein                           |
|        | SEQU_RS26600   | recombinase                                    |
|        | SEQU_RS26605   | CopG family transcriptional regulator          |
|        | SEQU_RS26610   | replication initiation protein                 |
|        | SEQU_RS26615   | tetracycline resistance MFS efflux pump        |
|        | SEQU_RS26660   | replication protein                            |

Table S3. Potential virulence determinants identified in the genomes of 15 *S. equorum* strains from cheeses.

| Virulence factor                               | Gene identification |              |     |     |       |        |        |        |        |       |        |        |       |       |        |
|------------------------------------------------|---------------------|--------------|-----|-----|-------|--------|--------|--------|--------|-------|--------|--------|-------|-------|--------|
|                                                | White_SAM           | OffWhite_SAM | BC9 | BC3 | 900_4 | 341_10 | RE2.24 | RE2.35 | RE2.40 | 738_7 | 908_10 | 947_12 | 962_6 | 862_5 | AR8-13 |
| <b>Haemolysis-related</b>                      |                     |              |     |     |       |        |        |        |        |       |        |        |       |       |        |
| Haemolysin                                     | ●                   | ●            | ●   | ●   | ●     | ●      | ●      | ●      | ●      | ●     | ●      | ●      | ●     | ●     | ●      |
| Haemolysin III                                 | ●                   | ●            | ●   | ●   | ●     | ●      | ●      | ●      | ●      | ●     | ●      | ●      | ●     | ●     | ●      |
| Haemolysin activation protein                  | ●                   | ●            | ●   | ●   | ●     | ●      | ●      | ●      | ●      | ●     | ●      | ●      | ●     | ●     | ●      |
| Haemolysin family calcium-binding region       |                     |              |     |     |       |        |        |        |        |       |        |        |       |       |        |
| <b>Antibiotic resistance</b>                   |                     |              |     |     |       |        |        |        |        |       |        |        |       |       |        |
| <i>Efflux pump</i>                             |                     |              |     |     |       |        |        |        |        |       |        |        |       |       |        |
| Chloramphenicol resistance protein DHA1        | ●                   | ●            | ●   | ●   | ●     | ●      | ●      | ●      | ●      | ●     | ●      | ●      | ●     | ●     | ●      |
| Lincomycin resistance protein LmrB             | ●                   | ●            | ●   | ●   | ●     | ●      | ●      | ●      | ●      | ●     | ●      | ●      | ●     | ●     | ●      |
| Quinolone resistance protein NorB              | ●                   | ●            | ●   | ●   | ●     | ●      | ●      | ●      |        | ●     | ●      | ●      | ●     | ●     | ●      |
| Quinolone resistance protein NorB              |                     |              |     | ●   | ●     | ●      | ●      | ●      | ●      | ●     | ●      | ●      | ●     | ●     | ●      |
| Multidrug resistance protein SepA              | ●                   | ●            | ●   | ●   | ●     | ●      | ●      | ●      | ●      | ●     | ●      | ●      | ●     | ●     | ●      |
| Multidrug resistance protein SMR               | ●                   | ●            | ●   | ●   | ●     | ●      | ●      | ●      | ●      | ●     | ●      | ●      | ●     | ●     | ●      |
| Antibiotic ABC transporter ATP-binding protein |                     |              |     | ●   |       |        | ●      | ●      |        | ●     | ●      | ●      | ●     | ●     | ●      |
| Tetracycline resistance MFS efflux pump        |                     |              |     |     |       |        |        |        |        |       |        |        |       |       |        |
| <i>Enzymatic inactivation</i>                  |                     |              |     |     |       |        |        |        |        |       |        |        |       |       |        |
| Methicillin resistance protein                 | ●                   | ●            | ●   | ●   | ●     | ●      | ●      | ●      | ●      | ●     | ●      | ●      | ●     | ●     | ●      |
| Methicillin resistance protein                 | ●                   | ●            | ●   | ●   | ●     | ●      | ●      | ●      | ●      | ●     | ●      | ●      | ●     | ●     | ●      |
| Methicillin resistance protein FemA            | ●                   |              | ●   | ●   | ●     | ●      | ●      |        | ●      |       |        |        |       |       | ●      |
| β-Lactamase                                    | ●                   | ●            | ●   | ●   |       |        |        |        |        |       | ●      |        |       |       |        |
| Lincomycin resistance protein LnuA             |                     |              |     |     |       |        |        |        |        |       |        |        |       |       |        |
| <i>Other</i>                                   |                     |              |     |     |       |        |        |        |        |       |        |        |       |       |        |
| Antibiotic biosynthesis monooxygenase          |                     |              |     |     |       |        |        | ●      |        |       | ●      |        |       |       |        |

Table S4. The putative amino acid identities between annotated potential virulence genes in *S. equorum*.

| Virulence factor                               | KM1031 | C2014 | KS1039 | Mu2  | UMC-CNS-924                              | G8HB1 |
|------------------------------------------------|--------|-------|--------|------|------------------------------------------|-------|
| <b>Haemolysis-related<sup>a</sup></b>          |        |       |        |      |                                          |       |
| Haemolysin                                     | 98.8   | 100   | –      | 98.8 | 98.8                                     | 99.1  |
| Haemolysin III                                 | 99.6   | 100   | 100    | 100  | 99.6                                     | 96.5  |
| Haemolysin activation protein                  | 97.7   | 100   | 97.7   | 97.7 | 30.2 (100)<br>37.2 (54.5)<br>30.2 (45.5) | 97.7  |
| Haemolysin family calcium-binding region       |        | 100   |        |      |                                          |       |
| <b>Antibiotic resistance<sup>b</sup></b>       |        |       |        |      |                                          |       |
| Chloramphenicol resistance protein DHA1        | 100    | 98.7  | 99.7   | 99.7 | 99.5                                     | 100   |
| Lincomycin resistance protein LmrB             | 100    | 97.0  | –      | 99.1 | 98.9                                     | 98.9  |
| Quinolone resistance protein NorB              | 100    | 97.8  | 99.3   | 99.3 | 100                                      | 100   |
| Quinolone resistance protein NorB              | 100    | 41.5  | 98.9   | 44.3 | 99.8                                     | 99.6  |
| Multidrug resistance protein SepA              | 100    | 99.3  | 100    | 100  | 100                                      | 98.0  |
| Multidrug resistance protein SMR               | 100    | 98.1  | 99.1   | 100  | 100                                      | 100   |
| Methicillin resistance protein                 | 100    | 99.3  | 99.8   | 100  | 100                                      | 100   |
| Methicillin resistance protein                 | 100    | 99.8  | 99.5   | 99.5 | 99.8                                     | 99.8  |
| Methicillin resistance protein femA            | 100    | 97.4  | 99.0   | 99.0 | 100                                      | 98.5  |
| β-Lactamase                                    | 100    | 80.4  | –      | 79.7 | 95.3                                     | 79.7  |
| Lincomycin resistance protein LnuA             | 100    | –     | –      | –    | 96.3                                     | –     |
| Tetracycline resistance MFS efflux pump        | –      | –     | –      | –    | 100                                      | –     |
| Antibiotic biosynthesis monooxygenase          | 100    | –     | –      | –    | –                                        | –     |
| Antibiotic ABC transporter ATP-binding protein | 100    | –     | –      | –    | 100                                      | 100   |

<sup>a</sup> The putative amino acid identities of haemolysis-related genes were compared with those from strain C2014. Identities in parentheses were calculated among the three haemolysin activation proteins identified in UMC-CNS-924 based on the gene SEQU\_RS16015.

<sup>b</sup> Putative amino acid sequences from the virulence genes of strain KM1031 were used for identity determination, except in the case of tetracycline resistance MFS efflux pump gene, which was only identified in strain UMC-CNS-924.



Table S5. Putative antibiotic resistance factors identified in six *S. equorum* strains and their homologous proteins in other organisms.

| Putative virulence factor               | Strain                    | Homologous protein                     | Identity | Accession No.  |
|-----------------------------------------|---------------------------|----------------------------------------|----------|----------------|
| Chloramphenicol resistance protein DHA1 | <i>S. xylosus</i>         | MFS transporter                        | 89       | WP_039067373.1 |
|                                         | <i>S. succinus</i>        | MFS transporter                        | 84       | WP_046835850.1 |
|                                         | <i>S. saprophyticus</i>   | chloramphenicol resistance protein     | 85       | WP_002482402.1 |
|                                         | <i>S. haemolyticus</i>    | MFS transporter                        | 74       | WP_049410867.1 |
|                                         | <i>S. aureus</i>          | MFS transporter                        | 72       | WP_000115415.1 |
| Lincomycin resistance protein LmrB      | <i>S. saprophyticus</i>   | MFS transporter                        | 87       | WP_011302025.1 |
|                                         | <i>Streptococcus equi</i> | major facilitator superfamily permease | 86       | CRV27957.1     |
|                                         | <i>S. cohnii</i>          | MFS transporter                        | 85       | WP_040030061.1 |
|                                         | <i>S. xylosus</i>         | MFS transporter                        | 83       | WP_039069546.1 |
|                                         | <i>S. succinus</i>        | MFS transporter                        | 80       | WP_046837658.1 |
| Quinolone resistance protein NorB       | <i>S. xylosus</i>         | MFS transporter                        | 83       | WP_039067198.1 |
|                                         | <i>S. cohnii</i>          | MFS transporter                        | 79       | WP_046207151.1 |
|                                         | <i>S. succinus</i>        | MFS transporter                        | 76       | WP_046836975.1 |
|                                         | <i>S. gallinarum</i>      | MFS transporter                        | 76       | WP_046836975.1 |
|                                         | <i>S. simiae</i>          | MFS transporter                        | 64       | WP_050801492.1 |
| Quinolone resistance protein NorB       | <i>S. xylosus</i>         | MFS transporter                        | 89       | WP_039069313.1 |
|                                         | <i>S. cohnii</i>          | MFS transporter                        | 87       | WP_040029752.1 |
|                                         | <i>S. succinus</i>        | MFS transporter                        | 86       | WP_046835963.1 |
|                                         | <i>S. gallinarum</i>      | MFS transporter                        | 82       | WP_042740359.1 |
|                                         | <i>S. microti</i>         | MFS transporter                        | 80       | WP_044360081.1 |
| Multidrug resistance protein SepA       | <i>S. gallinarum</i>      | multidrug resistance protein SepA      | 94       | WP_042739039.1 |
|                                         | <i>S. xylosus</i>         | multidrug resistance protein SepA      | 93       | WP_029378551.1 |
|                                         | <i>S. cohnii</i>          | multidrug resistance protein SepA      | 91       | WP_046208389.1 |
|                                         | <i>S. saprophyticus</i>   | multidrug resistance protein SepA      | 90       | WP_041080835.1 |
|                                         | <i>S. succinus</i>        | multidrug resistance protein SepA      | 88       | WP_046835623.1 |
| Multidrug resistance protein SMR        | <i>Staphylococcus</i>     | multidrug resistance protein SMR       | 100      | WP_002506070.1 |
|                                         | <i>Staphylococcus</i> sp. | multidrug resistance protein SMR       | 97       | WP_057511639.1 |
|                                         | <i>S. xylosus</i>         | multidrug resistance protein SMR       | 81       | WP_039069244.1 |

| Putative virulence factor                            | Strain                      | Homologous protein                               | Identity | Accession No.  |
|------------------------------------------------------|-----------------------------|--------------------------------------------------|----------|----------------|
|                                                      | <i>S. succinus</i>          | multidrug resistance protein SMR                 | 80       | WP_046836909.1 |
|                                                      | <i>S. cohnii</i>            | multidrug resistance protein SMR                 | 78       | WP_064209634.1 |
| Methicillin resistance protein                       | <i>S. xylosus</i>           | aminoacyltransferase                             | 93       | WP_039066581.1 |
|                                                      | <i>S. succinus</i>          | aminoacyltransferase                             | 91       | WP_046837466.1 |
|                                                      | <i>S. xylosus</i>           | factor essential for methicillin resistance FemA | 91       | AAC69634.1     |
|                                                      | <i>S. cohnii</i>            | aminoacyltransferase                             | 89       | WP_046208312.1 |
|                                                      | <i>S. gallinarum</i>        | aminoacyltransferase                             | 88       | WP_042738736.1 |
| Methicillin resistance protein                       | <i>S. saprophyticus</i>     | aminoacyltransferase                             | 93       | WP_011303147.1 |
|                                                      | <i>S. xylosus</i>           | aminoacyltransferase                             | 93       | WP_047172408.1 |
|                                                      | <i>S. gallinarum</i>        | aminoacyltransferase                             | 91       | WP_042738735.1 |
|                                                      | <i>S. succinus</i>          | aminoacyltransferase                             | 90       | WP_046837465.1 |
|                                                      | <i>S. cohnii</i>            | aminoacyltransferase                             | 90       | WP_046208311.1 |
| Methicillin resistance protein FemA                  | <i>S. epidermidis</i>       | FemA protein of FemAB family                     | 67       | ADA62617.1     |
|                                                      | <i>Bacillales</i>           | methicillin resistance protein                   | 67       | WP_020364758.1 |
|                                                      | <i>S. epidermidis</i>       | methicillin resistance protein                   | 66       | WP_064206559.1 |
|                                                      | <i>S. condimentii</i>       | methicillin resistance protein                   | 66       | WP_047132321.1 |
|                                                      | <i>S. aureus</i>            | methicillin resistance protein                   | 66       | WP_047210510.1 |
| $\beta$ -Lactamase                                   | <i>S. aureus</i>            | Zn-dependent hydrolase                           | 97       | WP_031885496.1 |
|                                                      | <i>S. arlettae</i>          | Zn-dependent hydrolase                           | 97       | WP_002510745.1 |
|                                                      | <i>S. saprophyticus</i>     | Zn-dependent hydrolase                           | 96       | WP_041080736.1 |
|                                                      | <i>S. vitulinus</i>         | hypothetical protein                             | 96       | WP_016911205.1 |
| Lincomycin resistance protein LnuA                   | <i>S. hemolyticus</i>       | lincosamide nucleotidyltransferase               | 99       | WP_053020242.1 |
|                                                      | <i>Lactobacillus oryzae</i> | lincosamide nucleotidyltransferase               | 99       | WP_034529812.1 |
|                                                      | <i>S. aureus</i>            | lincosamide nucleotidyltransferase               | 96       | WP_0.3491106.1 |
| Tetracycline resistance MFS efflux pump <sup>a</sup> | <i>Bacilli</i>              | tetracycline resistance MFS efflux pump          | 100      | WP_000492283.1 |
|                                                      | <i>S. aureus</i>            | tetracycline resistance protein                  | 99       | EVJ05357.1     |
|                                                      | <i>S. epidermidis</i>       | tetracycline resistance MFS efflux pump          | 99       | WP_040118612.1 |
|                                                      | <i>S. aureus</i>            | tetracycline resistance MFS efflux pump          | 99       | WP_000492285.1 |
|                                                      | <i>S. epidermidis</i>       | tetracycline efflux MFS transporter TetK         | 99       | WP_064658524.1 |
| Antibiotic biosynthesis monooxygenase                | <i>S. saprophyticus</i>     | antibiotic biosynthesis monooxygenase            | 100      | WP_002484388.1 |

| Putative virulence factor                      | Strain                              | Homologous protein                                 | Identity | Accession No.  |
|------------------------------------------------|-------------------------------------|----------------------------------------------------|----------|----------------|
|                                                | <i>Jeotgalicoccus psychrophilus</i> | antibiotic biosynthesis monooxygenase              | 99       | WP_026859823.1 |
|                                                | <i>S. xylosus</i>                   | antibiotic biosynthesis monooxygenase              | 99       | WP_017723728.1 |
|                                                | <i>Macrococcus caseolyticus</i>     | antibiotic biosynthesis monooxygenase              | 96       | WP_012655943.1 |
|                                                | <i>Aquinoicola tertiaricarbonis</i> | antibiotic biosynthesis monooxygenase              | 78       | WP_046111372.1 |
| Antibiotic ABC transporter ATP-binding protein | <i>S. aureus</i>                    | ABC-F type ribosomal protection protein            | 77       | WP_031881658.1 |
|                                                | <i>Listeria monocytogenes</i>       | macrolide efflux ABC Msr(A)                        | 76       | WP_063455884.1 |
|                                                | <i>S. epidermidis</i>               | Msr family ABC-F type ribosomal protection protein | 74       | WP_049385452.1 |
|                                                | <i>S. cohnii</i>                    | macrolide efflux ABC Msr(A)                        | 74       | WP_040030594.1 |
|                                                | <i>Pseudomonas</i> sp.              | ABC-F type ribosomal protection protein Msr(A)     | 74       | WP_063854341.1 |

The putative amino acid sequences of antibiotic resistance factors from strain KM1031 were used for identity determination, except in the case of tetracycline resistance MFS efflux pump only identified in strain UMC-CNS-924.

Table S6. Putative cardiolipin genes identified in six *S. equorum* genomes.

| Gene                   | Gene locus    |               |                |                |              |              |
|------------------------|---------------|---------------|----------------|----------------|--------------|--------------|
|                        | KM1031        | C2014         | KS1039         | Mu2            | UMC-CNS-924  | G8HB1        |
| Cardiolipin synthetase | AWC34_RS11580 | AVJ22_RS11875 | SE1039_RS11995 | SEQMU2_RS03840 | SEQU_RS17505 | UF72_RS11685 |
| Cardiolipin synthetase | AWC34_RS08615 | AVJ22_RS08965 | SE1039_RS09040 | SEQMU2_RS00915 | SEQU_RS25860 | UF72_RS11685 |

Table S7. Sodium/potassium transport systems in six *S. equorum* strains

| <b>Sodium/potassium efflux system</b>                             | <b>KM1031</b> | <b>C2014</b>  | <b>KS1039</b>  | <b>Mu2</b>     | <b>UMC-CNS-924</b> | <b>G8HB1</b> |
|-------------------------------------------------------------------|---------------|---------------|----------------|----------------|--------------------|--------------|
| Potassium efflux system KefA protein                              | AWC34_RS00590 | AVJ22_RS00505 | SE1039_RS00665 | SEQMU2_RS06175 | SEQU_RS22955       | UF72_RS06855 |
| Potassium voltage-gated channel subfamily KQT                     |               | AVJ22_RS01775 | SE1039_RS01900 |                |                    |              |
| Potassium voltage-gated channel subfamily KQT                     |               |               | SE1039_RS01905 |                |                    |              |
| Potassium uptake protein, integral membrane component, KtrB       | AWC34_RS03930 | AVJ22_RS03725 | SE1039_RS03890 | SEQMU2_RS09120 | SEQU_RS22200       | UF72_RS02425 |
| Trk system potassium uptake protein TrkA                          | AWC34_RS04230 | AVJ22_RS04060 | SE1039_RS04235 | SEQMU2_RS09445 | SEQU_RS15715       | UF72_RS02725 |
| Glutathione-regulated potassium-efflux system ATP-binding protein | AWC34_RS02815 | AVJ22_RS02605 | SE1039_RS02765 | SEQMU2_RS07555 | SEQU_RS21575       | UF72_RS01275 |
| Glutathione-regulated potassium-efflux system ATP-binding protein | AWC34_RS05695 | AVJ22_RS05960 | SE1039_RS06120 | SEQMU2_RS11170 | SEQU_RS19500       | UF72_RS04485 |
| Glutathione-regulated potassium-efflux system ATP-binding protein | AWC34_RS06795 |               | SE1039_RS07225 | SEQMU2_RS12335 | SEQU_RS19295       | UF72_RS05575 |
| Glutathione-regulated potassium-efflux system ATP-binding protein | AWC34_RS08420 | AVJ22_RS08760 | SE1039_RS08840 | SEQMU2_RS00730 | SEQU_RS26055       | UF72_RS13145 |
| Sodium-dependent transporter                                      | AWC34_RS00935 | AVJ22_RS00915 | SE1039_RS01045 | SEQMU2_RS06630 | SEQU_RS23300       | UF72_RS06515 |
| Sodium:alanine symporter                                          | AWC34_RS02090 | AVJ22_RS01880 | SE1039_RS02045 | SEQMU2_RS06830 | SEQU_RS22580       | UF72_RS00550 |
| Sodium:alanine symporter                                          | AWC34_RS03880 | AVJ22_RS03675 | SE1039_RS03840 | SEQMU2_RS09070 | SEQU_RS22150       | UF72_RS02375 |
| Sodium:alanine symporter                                          | AWC34_RS05500 | AVJ22_RS05725 | SE1039_RS05885 | SEQMU2_RS10980 | SEQU_RS16980       | UF72_RS04290 |
| Sodium:dicarboxylate symporter                                    | AWC34_RS07770 | AVJ22_RS08050 | SE1039_RS08190 | SEQMU2_RS13320 | SEQU_RS26225       | UF72_RS13410 |
| Sodium:proton antiporter                                          | AWC34_RS02375 | AVJ22_RS02165 | SE1039_RS02335 | SEQMU2_RS07120 | SEQU_RS22870       | UF72_RS00840 |
| Sodium:proton antiporter                                          | AWC34_RS03560 | AVJ22_RS03360 | SE1039_RS03525 | SEQMU2_RS08750 | SEQU_RS24880       | UF72_RS02055 |
| Sodium:proton antiporter                                          | AWC34_RS03865 | AVJ22_RS03660 | SE1039_RS03825 | SEQMU2_RS09055 | SEQU_RS22135       | UF72_RS02360 |
| Sodium:proton antiporter                                          | AWC34_RS09570 | AVJ22_RS09975 | SE1039_RS09995 | SEQMU2_RS01855 | SEQU_RS14260       | UF72_RS09025 |
| Sodium:proton antiporter                                          | AWC34_RS09730 | AVJ22_RS10135 | SE1039_RS10155 | SEQMU2_RS02015 | SEQU_RS14420       | UF72_RS09185 |
| Sodium:proton antiporter                                          | AWC34_RS09825 | AVJ22_RS10230 | SE1039_RS10250 | SEQMU2_RS02110 | SEQU_RS14515       | UF72_RS09280 |
| Sodium:proton antiporter                                          | AWC34_RS10590 | AVJ22_RS10985 | SE1039_RS11015 | SEQMU2_RS02895 | SEQU_RS15285       | UF72_RS10050 |
| Sodium:proton antiporter                                          | AWC34_RS10840 | AVJ22_RS11215 | SE1039_RS11250 | SEQMU2_RS03125 | SEQU_RS15530       | UF72_RS10295 |
| Sodium ABC transporter ATP-binding protein                        | AWC34_RS08310 | AVJ22_RS08605 | SE1039_RS08730 | SEQMU2_RS00620 | SEQU_RS26170       | UF72_RS13035 |
| Sodium transporter                                                | AWC34_RS09700 | AVJ22_RS10110 | SE1039_RS10130 | SEQMU2_RS01990 | SEQU_RS14395       | UF72_RS09160 |
| Sodium ABC transporter permease                                   | AWC34_RS09800 | AVJ22_RS10205 | SE1039_RS10225 | SEQMU2_RS02085 | SEQU_RS14490       | UF72_RS09255 |
| Sodium:glutamate symporter                                        | AWC34_RS09830 | AVJ22_RS10235 | SE1039_RS10255 | SEQMU2_RS02115 | SEQU_RS14520       | UF72_RS09285 |
| Proline:sodium symporter                                          | AWC34_RS10580 | AVJ22_RS10975 | SE1039_RS11005 | SEQMU2_RS02885 | SEQU_RS15275       | UF72_RS10040 |

**Figure S1. Genomic alignment of six *S. equorum* strains.**

MAUVE alignment of the genome sequences of *S. equorum* strains KM1031, C2014, KS1039, Mu2, UMC-CNS-924 and G8HB1. Boxes with the same colour represent homologous regions of sequences, without rearrangement (locally collinear blocks), shared among *S. equorum* genomes.

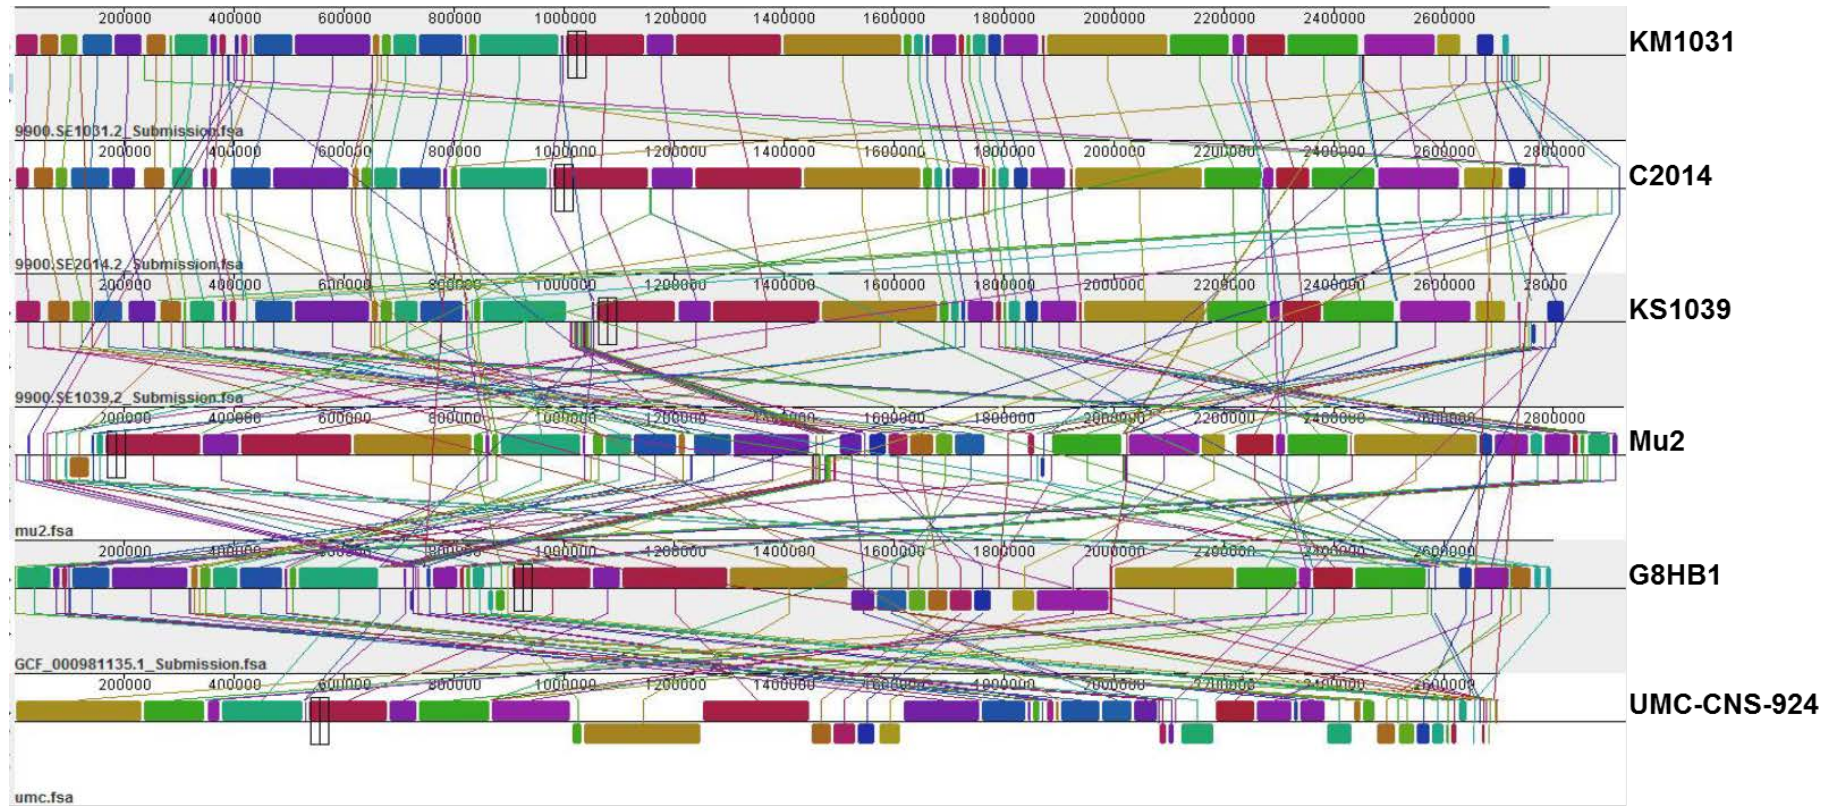

**Figure S2.  $\beta$ -Haemolytic (A) and  $\delta$ -haemolytic (B) activities of *S. equorum* strains on sheep blood-supplemented TSA plates. *Staphylococcus aureus* USA300-P23 was used as a positive control.**

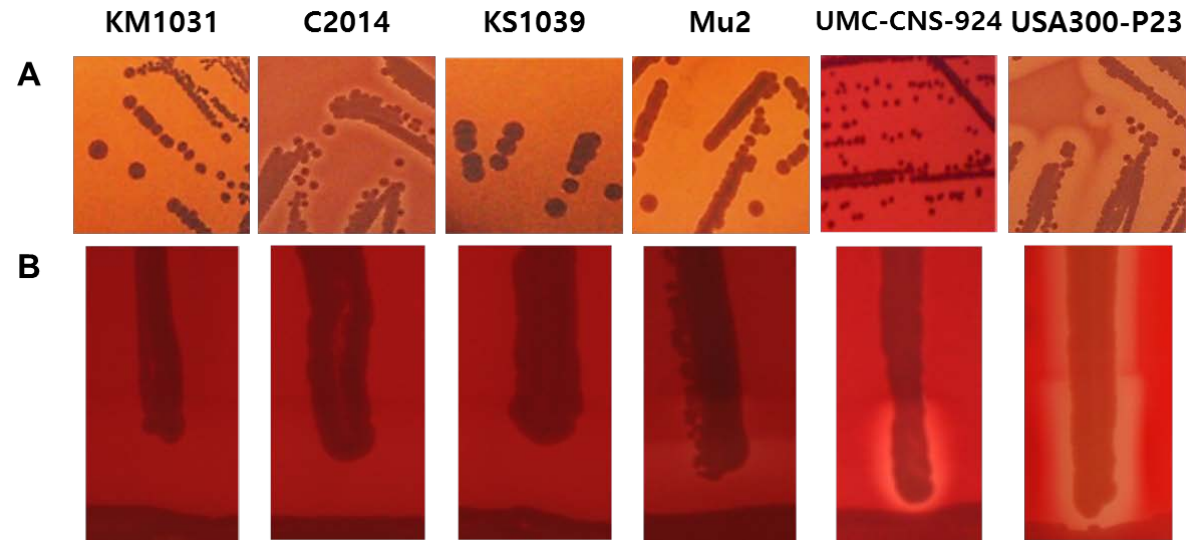

Figure S3. Growth of *S. equorum* strains in the presence of NaCl.

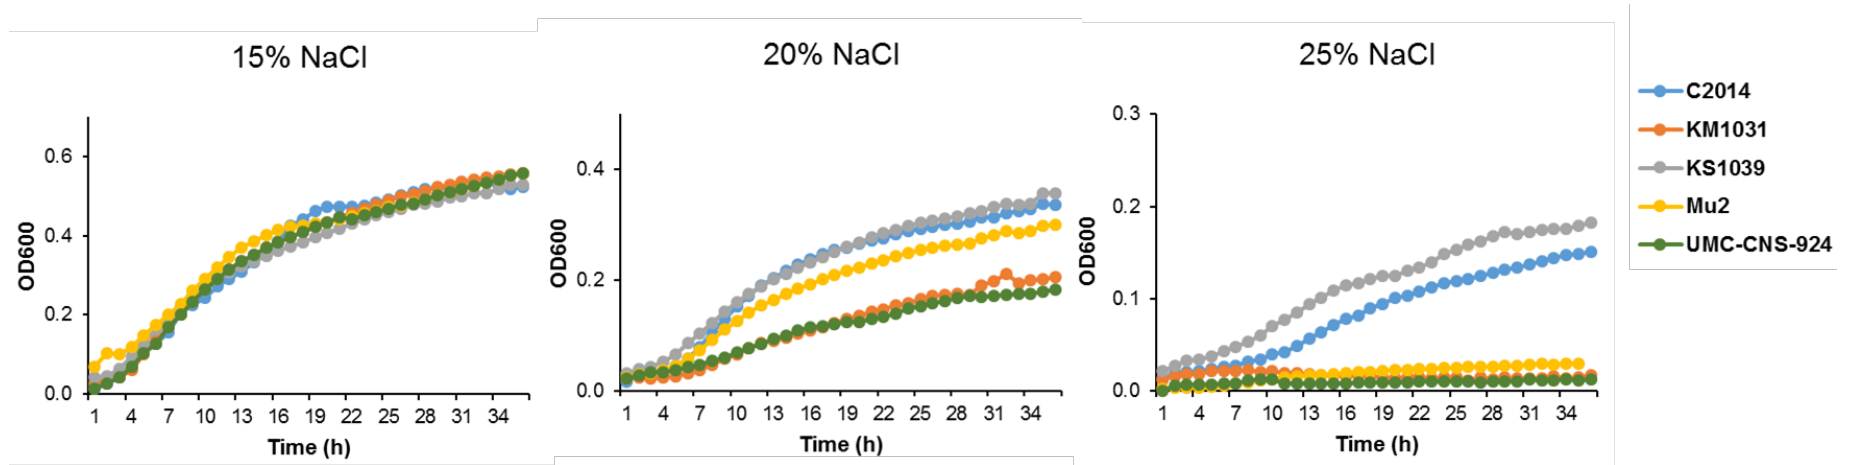



**Figure S4. Genetic structures of the potassium voltage-gated channel genes.** HPs presented by grey arrows indicate hypothetical proteins. Ball, ball domain; TM, transmembrane; L, re-entrant loop.

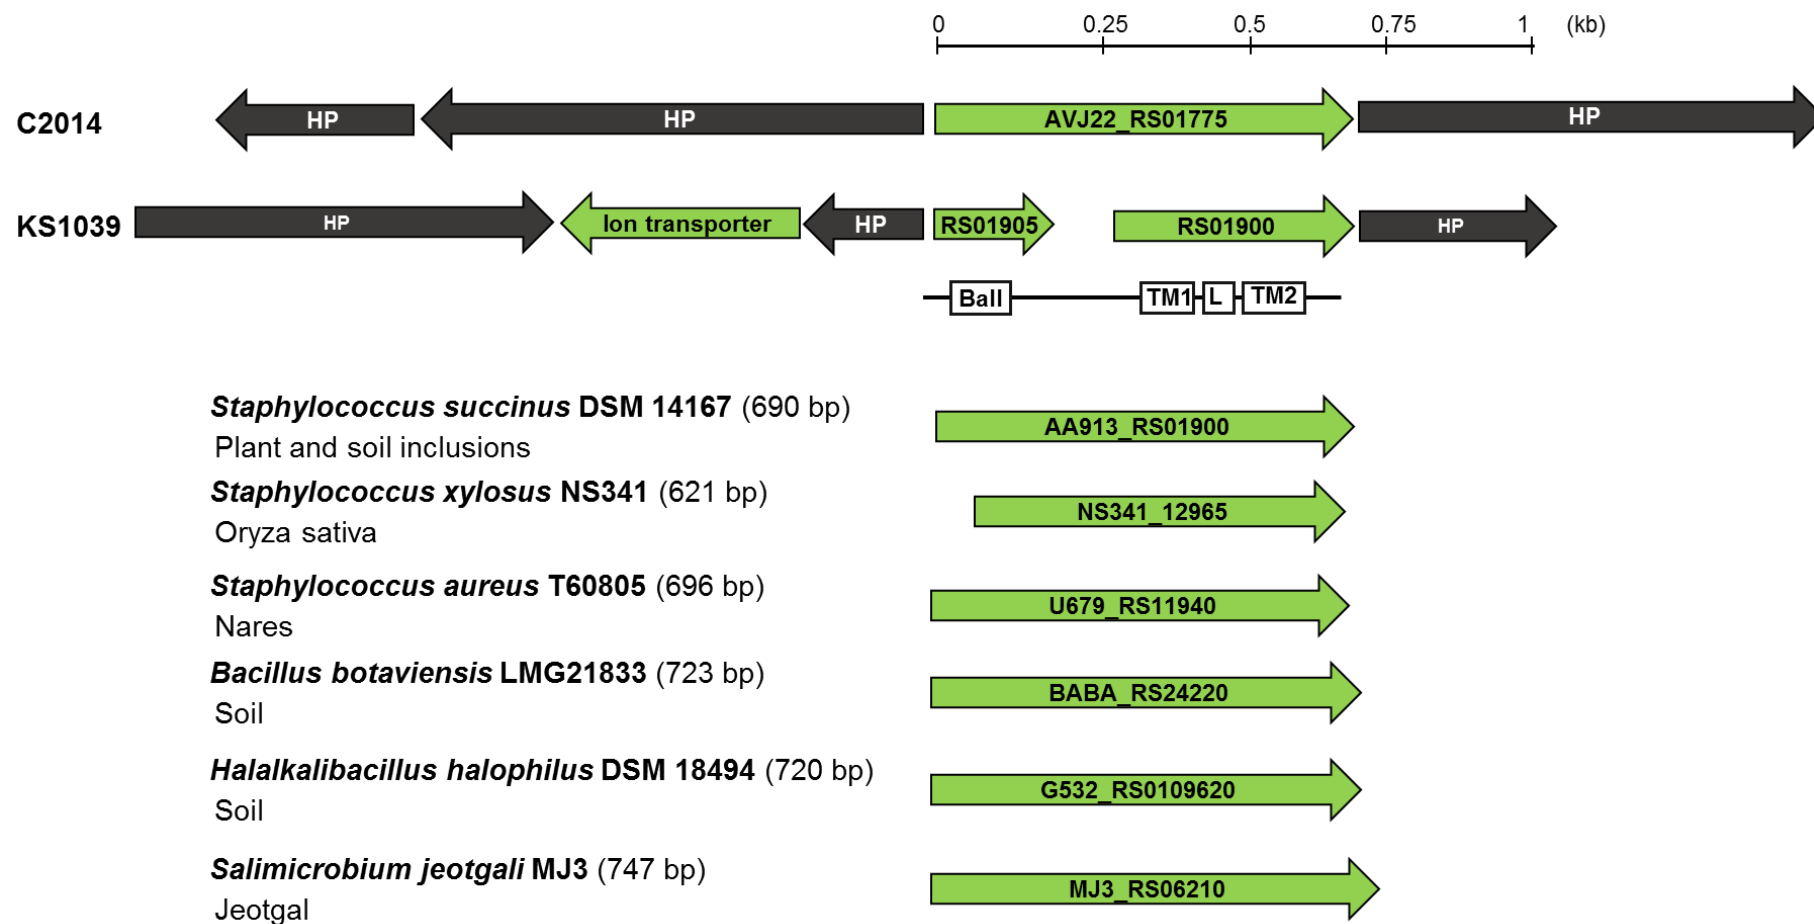

Supplement: 41598_2017_5918_MOESM1_ESM.pdf [file 41598_2017_5918_MOESM1_ESM.pdf]
